# Supplementary material for: C. elegans protein interaction network analysis probes RNAi validated pro-longevity effect of nhr-6, a human homolog of tumor suppressor Nr4a1
Source: PubMed Central journal article supplement (PMC6823380; doi:10.1038/s41598-019-51649-0), 2019-10-31
Supplement: 41598_2019_51649_MOESM3_ESM.pdf [file 41598_2019_51649_MOESM3_ESM.pdf]

## Supplementary Table 2: GO-Slim annotation (biological process) of primary and secondary network of tumor suppressor *nhr-6*

### ***C. elegans* protein interaction network analysis probes RNAi validated pro-longevity effect of *nhr-6*, a human homolog of tumor suppressor Nr4a1**

Bashir A. Akhoun<sup>1†</sup>, Shishir K Gupta<sup>2†</sup>, Sudeep Tiwari<sup>1</sup>, Laxmi Rathor<sup>1</sup>, Aakanksha Pant<sup>1</sup>, Nivedita Singh<sup>3</sup>, Shailendra K Gupta<sup>4</sup>, Thomas Dandekar<sup>2,5,\*</sup>, Rakesh Pandey<sup>1,\*</sup>

<sup>1</sup> Microbial Technology and Nematology Department, CSIR - Central Institute of Medicinal and Aromatic Plants, Lucknow 226015, India

<sup>2</sup> Department of Bioinformatics, Biocenter, University of Würzburg, Wuerzburg, 97074, Germany

<sup>3</sup> Department of Bioinformatics, CSIR-Indian Institute of Toxicology Research, Lucknow, 226015, India

<sup>4</sup> Department of Systems Biology and Bioinformatics, University of Rostock, Rostock, 18051, Germany

<sup>5</sup> BioComputing Unit, EMBL Heidelberg, Heidelberg, 69117, Germany

\* Corresponding authors: Rakesh Pandey: Tel: +91 9453023391; Fax: +91 0522 2716141; Email: r.pandey@cimap.res.in and Thomas Dandekar: Tel:+49 931 31 84551; Fax: +49 931 31 84552; Email: dandekar@biozentrum.uni-wuerzburg.de

## GO-Slim annotation (biological process) of primary and secondary network of tumor suppressor *nhr-6*

### Primary Network

| PANTHER      | GO-Slim | Biological Process | #   | #     | expected | Fold Enrichment | +/-      | raw P value | FDR |
|--------------|---------|--------------------|-----|-------|----------|-----------------|----------|-------------|-----|
| MAPK cascade | 107     | 5                  | .19 | 26.78 | +        | 1.40E-06        | 3.13E-04 |             |     |

|                                   |       |    |       |       |   |          |          |
|-----------------------------------|-------|----|-------|-------|---|----------|----------|
| intracellular signal transduction | 394   | 6  | .69   | 8.73  | + | 5.97E-05 | 2.67E-03 |
| signal transduction               | 849   | 7  | 1.48  | 4.72  | + | 5.88E-04 | 2.19E-02 |
| cell communication                | 957   | 7  | 1.67  | 4.19  | + | 1.18E-03 | 3.31E-02 |
| cellular process                  | 4274  | 20 | 7.46  | 2.68  | + | 4.20E-06 | 3.14E-04 |
| DNA repair                        | 102   | 3  | .18   | 16.85 | + | 8.04E-04 | 2.57E-02 |
| metabolic process                 | 3682  | 17 | 6.43  | 2.65  | + | 4.70E-05 | 2.63E-03 |
| developmental process             | 465   | 5  | .81   | 6.16  | + | 1.25E-03 | 3.10E-02 |
| Unclassified                      | 13969 | 11 | 24.38 | .45   | - | 3.67E-06 | 4.11E-04 |

### **Secondary Network**

| <b>PANTHER GO-Slim Biological Process</b> | <b>#</b> | <b>#</b> | <b>expected</b> | <b>Fold Enrichment</b> | <b>+/-</b> | <b>raw P value</b> | <b>FDR</b> |
|-------------------------------------------|----------|----------|-----------------|------------------------|------------|--------------------|------------|
| cell-matrix adhesion                      | 9        | 4        | .31             | 12.75                  | +          | 7.15E-04           | 3.91E-03   |
| negative regulation of apoptotic process  | 44       | 10       | 1.53            | 6.52                   | +          | 1.10E-05           | 1.23E-04   |

|                                                                  |      |     |        |      |   |          |          |  |
|------------------------------------------------------------------|------|-----|--------|------|---|----------|----------|--|
| regulation of biological process                                 | 1134 | 74  | 39.52  | 1.87 | + | 6.07E-07 | 9.71E-06 |  |
| biological regulation                                            | 1410 | 81  | 49.14  | 1.65 | + | 1.90E-05 | 2.03E-04 |  |
| apoptotic process                                                | 104  | 12  | 3.62   | 3.31 | + | 5.44E-04 | 3.05E-03 |  |
| cell death                                                       | 106  | 13  | 3.69   | 3.52 | + | 1.89E-04 | 1.24E-03 |  |
| death                                                            | 106  | 13  | 3.69   | 3.52 | + | 1.89E-04 | 1.28E-03 |  |
| developmental process                                            | 465  | 48  | 16.21  | 2.96 | + | 1.83E-10 | 8.18E-09 |  |
| transmembrane receptor protein tyrosine kinase signaling pathway | 24   | 5   | .84    | 5.98 | + | 2.59E-03 | 1.18E-02 |  |
| cell surface receptor signaling pathway                          | 272  | 21  | 9.48   | 2.22 | + | 1.46E-03 | 7.28E-03 |  |
| signal transduction                                              | 849  | 67  | 29.59  | 2.26 | + | 2.71E-09 | 1.01E-07 |  |
| cell communication                                               | 957  | 71  | 33.35  | 2.13 | + | 8.22E-09 | 2.63E-07 |  |
| cellular process                                                 | 4274 | 272 | 148.95 | 1.83 | + | 3.98E-25 | 4.46E-23 |  |
| chromatin assembly                                               | 24   | 5   | .84    | 5.98 | + | 2.59E-03 | 1.16E-02 |  |
| organelle organization                                           | 608  | 41  | 21.19  | 1.93 | + | 1.37E-04 | 1.06E-03 |  |
| cellular component organization                                  | 898  | 66  | 31.30  | 2.11 | + | 4.21E-08 | 9.42E-07 |  |
| cellular component organization or biogenesis                    | 1007 | 72  | 35.09  | 2.05 | + | 2.91E-08 | 7.23E-07 |  |
| RNA localization                                                 | 48   | 9   | 1.67   | 5.38 | + | 1.12E-04 | 9.29E-04 |  |
| localization                                                     | 1148 | 66  | 40.01  | 1.65 | + | 1.44E-04 | 1.04E-03 |  |
| MAPK cascade                                                     | 107  | 18  | 3.73   | 4.83 | + | 2.06E-07 | 3.85E-06 |  |
| intracellular signal transduction                                | 394  | 33  | 13.73  | 2.40 | + | 9.52E-06 | 1.18E-04 |  |
| cell-cell adhesion                                               | 30   | 5   | 1.05   | 4.78 | + | 6.00E-03 | 2.40E-02 |  |

|                                                  |      |     |        |      |   |          |          |  |  |
|--------------------------------------------------|------|-----|--------|------|---|----------|----------|--|--|
| cell differentiation                             | 135  | 20  | 4.70   | 4.25 | + | 2.77E-07 | 4.78E-06 |  |  |
| cellular component morphogenesis                 | 112  | 15  | 3.90   | 3.84 | + | 2.48E-05 | 2.52E-04 |  |  |
| anatomical structure morphogenesis               | 31   | 6   | 1.08   | 5.55 | + | 1.36E-03 | 6.93E-03 |  |  |
| phospholipid metabolic process                   | 119  | 15  | 4.15   | 3.62 | + | 4.68E-05 | 4.19E-04 |  |  |
| lipid metabolic process                          | 324  | 25  | 11.29  | 2.21 | + | 4.26E-04 | 2.45E-03 |  |  |
| primary metabolic process                        | 2940 | 176 | 102.46 | 1.72 | + | 1.01E-12 | 5.67E-11 |  |  |
| metabolic process                                | 3682 | 234 | 128.32 | 1.82 | + | 9.97E-21 | 7.45E-19 |  |  |
| phosphate-containing compound metabolic process  | 1011 | 71  | 35.23  | 2.02 | + | 8.08E-08 | 1.65E-06 |  |  |
| system development                               | 64   | 8   | 2.23   | 3.59 | + | 2.85E-03 | 1.25E-02 |  |  |
| nucleobase-containing compound transport         | 82   | 10  | 2.86   | 3.50 | + | 1.06E-03 | 5.50E-03 |  |  |
| transport                                        | 1035 | 60  | 36.07  | 1.66 | + | 1.98E-04 | 1.27E-03 |  |  |
| nuclear transport                                | 67   | 8   | 2.33   | 3.43 | + | 3.68E-03 | 1.56E-02 |  |  |
| fatty acid metabolic process                     | 114  | 13  | 3.97   | 3.27 | + | 3.60E-04 | 2.12E-03 |  |  |
| chromatin organization                           | 145  | 16  | 5.05   | 3.17 | + | 1.12E-04 | 9.64E-04 |  |  |
| cellular component movement                      | 158  | 16  | 5.51   | 2.91 | + | 2.75E-04 | 1.66E-03 |  |  |
| DNA repair                                       | 102  | 10  | 3.55   | 2.81 | + | 4.56E-03 | 1.86E-02 |  |  |
| DNA metabolic process                            | 213  | 20  | 7.42   | 2.69 | + | 1.29E-04 | 1.03E-03 |  |  |
| nucleobase-containing compound metabolic process | 1510 | 98  | 52.62  | 1.86 | + | 8.67E-09 | 2.43E-07 |  |  |
| RNA splicing, via transesterification reactions  | 107  | 10  | 3.73   | 2.68 | + | 6.20E-03 | 2.43E-02 |  |  |
| RNA metabolic process                            | 840  | 56  | 29.27  | 1.91 | + | 1.01E-05 | 1.19E-04 |  |  |

|                                                             |       |      |        |       |      |          |          |          |
|-------------------------------------------------------------|-------|------|--------|-------|------|----------|----------|----------|
| regulation of phosphate metabolic process                   | 215   | 20   | 7.49   | 2.67  | +    | 1.45E-04 | 1.02E-03 |          |
| regulation of catalytic activity                            | 157   | 14   | 5.47   | 2.56  | +    | 1.99E-03 | 9.69E-03 |          |
| regulation of molecular function                            | 175   | 15   | 6.10   | 2.46  | +    | 2.00E-03 | 9.54E-03 |          |
| mRNA splicing, via spliceosome                              | 119   | 10   | 4.15   | 2.41  | +    | 1.20E-02 | 4.54E-02 |          |
| cell cycle                                                  | 397   | 32   | 13.84  | 2.31  | +    | 3.10E-05 | 3.02E-04 |          |
| regulation of transcription from RNA polymerase II promoter |       | 234  | 16     | 8.16  | 1.96 | +        | 1.27E-02 | 4.74E-02 |
| transcription from RNA polymerase II promoter               |       | 356  | 26     | 12.41 | 2.10 | +        | 7.77E-04 | 4.15E-03 |
| transcription, DNA-dependent                                | 455   | 35   | 15.86  | 2.21  | +    | 3.36E-05 | 3.14E-04 |          |
| cellular protein modification process                       | 545   | 37   | 18.99  | 1.95  | +    | 2.46E-04 | 1.53E-03 |          |
| protein metabolic process                                   | 1042  | 61   | 36.31  | 1.68  | +    | 1.43E-04 | 1.07E-03 |          |
| cellular component biogenesis                               | 423   | 28   | 14.74  | 1.90  | +    | 2.08E-03 | 9.69E-03 |          |
| biosynthetic process                                        | 1028  | 67   | 35.83  | 1.87  | +    | 2.53E-06 | 3.34E-05 |          |
| response to stress                                          | 420   | 27   | 14.64  | 1.84  | +    | 3.29E-03 | 1.42E-02 |          |
| response to stimulus                                        | 1465  | 87   | 51.06  | 1.70  | +    | 2.40E-06 | 3.36E-05 |          |
| intracellular protein transport                             | 383   | 24   | 13.35  | 1.80  | +    | 7.78E-03 | 3.00E-02 |          |
| protein transport                                           | 399   | 26   | 13.91  | 1.87  | +    | 3.80E-03 | 1.58E-02 |          |
| nitrogen compound metabolic process                         |       | 1413 | 87     | 49.24 | 1.77 | +        | 7.30E-07 | 1.09E-05 |
| Unclassified                                                | 13969 | 342  | 486.83 | .70   | -    | 4.43E-29 | 9.92E-27 |          |
